# Supplementary material for: Myocarditis or Pericarditis Following the COVID-19 Vaccination in Adolescents: A Systematic Review
Source: MDPI journal article supplement (doi:10.3390/vaccines10081316), 2022-08-15
Supplement: s1 [file s1]

**Table S1.** Search strategy.

| Databases      | Detailed Search Strategy                                                                                                                                                                                                                                                                                                                                                                                                                                                                                                                                                                                                                                                                                                                                                                                                                                                                                                                                                                                                                                                                                                                                                                                                         |
|----------------|----------------------------------------------------------------------------------------------------------------------------------------------------------------------------------------------------------------------------------------------------------------------------------------------------------------------------------------------------------------------------------------------------------------------------------------------------------------------------------------------------------------------------------------------------------------------------------------------------------------------------------------------------------------------------------------------------------------------------------------------------------------------------------------------------------------------------------------------------------------------------------------------------------------------------------------------------------------------------------------------------------------------------------------------------------------------------------------------------------------------------------------------------------------------------------------------------------------------------------|
| Pubmed         | <p>("vaccines" [MeSH Terms] OR "Vaccination" [MeSH Terms] OR "Vaccine" [Title/Abstract] OR "Vaccination" [Title/Abstract] OR "active immunization" [Title/Abstract]) AND ("COVID-19" [MeSH Terms] OR "SARS-CoV-2" [MeSH Terms] OR "COVID-19" [Title/Abstract] OR "SARS-CoV-2" [Title/Abstract] OR "2019 novel coronavirus" [Title/Abstract] OR "SARS-CoV-2" [MeSH Terms] OR "COVID19" [Title/Abstract] OR "2019-nCoV" [Title/Abstract] OR "coronavirus disease 2019" [Title/Abstract] OR "coronavirus disease 2019 virus" [Title/Abstract] OR "sars coronavirus 2" [Title/Abstract] OR "coronavirus disease 19" [Title/Abstract] OR "sars cov 2 virus" [Title/Abstract]) AND ("Child" [MeSH Terms] OR "Infant" [MeSH Terms] OR "Adolescent" [MeSH Terms] OR "Child" [Title/Abstract] OR "Children" [Title/Abstract] OR "Childhood" [Title/Abstract] OR "Infant" [Title/Abstract] OR "Adolescent" [Title/Abstract] OR "Adolescence" [Title/Abstract] OR "Teenager" [Title/Abstract] OR "Youth" [Title/Abstract]) AND ("Myocarditis" [MeSH Terms] OR "cardiomyopathies" [MeSH Terms] OR "Cardiomyopathy" [Title/Abstract] OR "Myocarditis" [Title/Abstract] OR "Pericarditis" [MeSH Terms] OR "Pericarditis" [Title/Abstract])</p> |
| Wed of science | <p>TS = ((vaccine OR vaccination OR "active immunization" OR "active immunizations") AND ("COVID-19" OR "SARS-CoV-2" OR "2019 novel coronavirus" OR "2019 novel coronavirus" OR COVID19 OR "2019-nCoV" OR "coronavirus disease 2019" OR "SARS Coronavirus 2" OR "Coronavirus Disease-19" OR "SARS CoV 2 Virus" OR "Severe acute respiratory syndrome coronavirus 2") AND (child OR infant OR juvenile OR children OR childhood OR adolescence OR adolescent OR teenager OR youth) AND (myocarditis OR cardiomyopathy OR pericarditis))</p>                                                                                                                                                                                                                                                                                                                                                                                                                                                                                                                                                                                                                                                                                       |
| Embase         | <p>('vaccine'/exp OR 'vaccination'/exp OR 'active immunization'/exp OR 'vaccine' OR 'vaccination' OR 'active immunization':ab,ti) AND ('coronavirus disease 2019'/exp OR 'severe acute respiratory syndrome coronavirus 2'/exp OR 'covid-19'/exp OR 'sars-cov-2'/exp OR '2019 novel coronavirus'/exp OR 'covid19'/exp OR '2019-ncov'/exp OR 'sars coronavirus 2'/exp OR 'coronavirus disease-19'/exp OR 'covid-19' OR 'sars-cov-2' OR '2019 novel coronavirus' OR '2019 novelcoronaviruses' OR 'covid19' OR '2019-ncov' OR 'coronavirus disease 2019' OR 'sars coronavirus 2' OR 'coronavirus disease-19' OR 'sars cov 2 virus':ab,ti) AND ('adolescent'/exp OR 'child'/exp OR 'juvenile'/exp OR 'child':ab,ti OR 'infant':ab,ti OR 'juvenile':ab,ti OR 'children':ab,ti OR 'childhood':ab,ti OR 'adolescence':ab,ti OR 'adolescent':ab,ti OR 'teenager':ab,ti OR 'youth':ab,ti) AND ('myocarditis'/exp OR 'cardiomyopathies'/exp OR 'pericarditis'/exp OR 'myocarditis':ab,ti OR 'cardiomyopathies':ab,ti OR 'pericarditis':ab,ti)</p>                                                                                                                                                                                          |

**Table S2.** Included study articles.

| First author  | Publication time | Study design               | Country | Type of COVID-19 vaccine | Age of population (years old) | Number of people vaccinated with 1st Dose COVID-19 | Number of people with myocarditis/pericarditis after 1st Dose | Number of people vaccinated with 2nd Dose COVID-19 | Number of people with myocarditis/pericarditis after 2nd Dose | male Number of people vaccinated with 2nd Dose COVID-19 | male Number of people with myocarditis/pericarditis after 2nd Dose | female Number of people vaccinated with 2nd Dose COVID-19 | female Number of people with myocarditis/pericarditis after 2nd Dose | Diagnostic criteria             |
|---------------|------------------|----------------------------|---------|--------------------------|-------------------------------|----------------------------------------------------|---------------------------------------------------------------|----------------------------------------------------|---------------------------------------------------------------|---------------------------------------------------------|--------------------------------------------------------------------|-----------------------------------------------------------|----------------------------------------------------------------------|---------------------------------|
| Dror Mevorach | 2022             | retrospective cohort study | Israeli | BNT162b2                 | 12-15                         | 404,407                                            | 1                                                             | 326,463                                            | 13                                                            | 157,153                                                 | 11                                                                 | 169,310                                                   | 1                                                                    | International Classification of |

|                        |      |                                             |         |                                   |       |         |    |         |    |         |    |         |   |                                                                                                                          |
|------------------------|------|---------------------------------------------|---------|-----------------------------------|-------|---------|----|---------|----|---------|----|---------|---|--------------------------------------------------------------------------------------------------------------------------|
|                        |      |                                             |         |                                   |       |         |    |         |    |         |    |         |   | Diseases, 10th Revision (ICD-10) and Brighton Collaboration                                                              |
| Dror Mevorach          | 2021 | retrospective cohort study                  | Israeli | BNT162b2                          | 16-19 | 443,978 | 3  | 398,821 | 32 | 199,115 | 30 | 199,706 | 2 | International Classification of Diseases, 9th Revision (ICD-9) and Brighton Collaboration                                |
| Francisco Tsz Tsun Lai | 2022 | population-based retrospective cohort study | China   | BNT162b2                          | 12-18 | 139,482 | 8  | 120,830 | 30 | /       | /  | /       | / | International Classification of Diseases, Ninth Revision (ICD-9) and International Classification of Primary Care (ICPC) |
| Gilbert T Chua         | 2021 | population cohort study                     | China   | Comirnaty vaccine                 | 12-17 | 178,163 | 6  | /       | 27 | /       | /  | /       | / | Cardiovascular Injury-Coalition for Epidemic Preparedness Innovations (CEPI) and the Brighton Working Group              |
| Ulrikka Nygaard        | 2021 | prospective population-based cohort study   | Danish  | Pfizer-BioTech mRNA COVID vaccine | 12-17 | 261,334 | 15 | /       | /  | /       | /  | /       | / | Hospital diagnosis                                                                                                       |
| Xue Li                 | 2022 | cohort study                                | China   | /                                 | 12-17 | 224,358 | 7  | 162,528 | 36 | /       | /  | /       | / | International Classification of Diseases, Ninth Revision (ICD-9), Clinical Modification (422.x and 429.0)                |

|                       |      |                            |             |          |       |         |   |         |    |   |   |   |   |   |
|-----------------------|------|----------------------------|-------------|----------|-------|---------|---|---------|----|---|---|---|---|---|
| Young<br>June<br>Choe | 2022 | retrospective cohort study | South Korea | BNT162b2 | 12-18 | 444,313 | 8 | 442,025 | 19 | / | / | / | / | / |
|-----------------------|------|----------------------------|-------------|----------|-------|---------|---|---------|----|---|---|---|---|---|

**Table S3.** Risk of bias assessment.

| Quality assessment of cross-sectional study by AHRQ |                                                          |                                                                                                                                                                                     |                                                                               |                                                                                                  |                                                                               |                                                                                                                                                                        |                                                                             |                                                              |                                                                      |                                                                                                                                                                                            |             |                  |
|-----------------------------------------------------|----------------------------------------------------------|-------------------------------------------------------------------------------------------------------------------------------------------------------------------------------------|-------------------------------------------------------------------------------|--------------------------------------------------------------------------------------------------|-------------------------------------------------------------------------------|------------------------------------------------------------------------------------------------------------------------------------------------------------------------|-----------------------------------------------------------------------------|--------------------------------------------------------------|----------------------------------------------------------------------|--------------------------------------------------------------------------------------------------------------------------------------------------------------------------------------------|-------------|------------------|
| First author and Publication time                   | Define the source of information (survey, record review) | Whether the representativeness of the exposure cohort is truly or somewhat representative of the average incidence of post-vaccination myocarditis or pericarditis in the community | Whether the non-exposed group is from the same community as the exposed group | Exposure is determined through - safety records (e.g. surgical records) or structured interviews | Prove that the result of interest did not exist at the beginning of the study | Comparability of cohorts based on design or analysis was controlled for studies of the incidence of post-vaccine myocarditis or pericarditis, or for any other factor. | The assessment of outcomes is an independent assessment or recorded contact | Is the follow-up period long enough for the outcome to occur | If applicable, explain how missing data were handled in the analysis | Adequacy of cohort follow-up, e.g. complete follow-up (all subjects included) or subjects lost to follow-up are unlikely to introduce bias, e.g. the number lost is small (≥60% follow-up) | Total score | Risk of bias     |
| Dror Mevorach 2022                                  | 0                                                        | 1                                                                                                                                                                                   | 0                                                                             | 1                                                                                                | 1                                                                             | 1                                                                                                                                                                      | 1                                                                           | 0                                                            | 1                                                                    | 1                                                                                                                                                                                          | 7           | Low risk of bias |
| Dror Mevorach 2021                                  | 1                                                        | 1                                                                                                                                                                                   | 0                                                                             | 1                                                                                                | 1                                                                             | 1                                                                                                                                                                      | 1                                                                           | 1                                                            | 1                                                                    | 1                                                                                                                                                                                          | 9           | Low risk of bias |
| Francisco Tsz Tsun Lai 2022                         | 1                                                        | 1                                                                                                                                                                                   | 1                                                                             | 1                                                                                                | 1                                                                             | 1                                                                                                                                                                      | 1                                                                           | 1                                                            | 0                                                                    | 1                                                                                                                                                                                          | 9           | Low risk of bias |
| Gilbert T Chua 2021                                 | 1                                                        | 1                                                                                                                                                                                   | 0                                                                             | 0                                                                                                | 1                                                                             | 1                                                                                                                                                                      | 1                                                                           | 1                                                            | 1                                                                    | 1                                                                                                                                                                                          | 8           | Low risk of bias |
| Ulrikka Nygaard 2021                                | 1                                                        | 1                                                                                                                                                                                   | 0                                                                             | 1                                                                                                | 1                                                                             | 1                                                                                                                                                                      | 1                                                                           | 0                                                            | 1                                                                    | 0                                                                                                                                                                                          | 7           | Low risk of bias |
| Xue Li 2022                                         | 1                                                        | 1                                                                                                                                                                                   | 1                                                                             | 0                                                                                                | 1                                                                             | 1                                                                                                                                                                      | 1                                                                           | 1                                                            | 1                                                                    | 0                                                                                                                                                                                          | 8           | Low risk of bias |
| YoungJune Choe 2022                                 | 1                                                        | 1                                                                                                                                                                                   | 0                                                                             | 0                                                                                                | 1                                                                             | 1                                                                                                                                                                      | 1                                                                           | 1                                                            | 0                                                                    | 1                                                                                                                                                                                          | 7           | Low risk of bias |

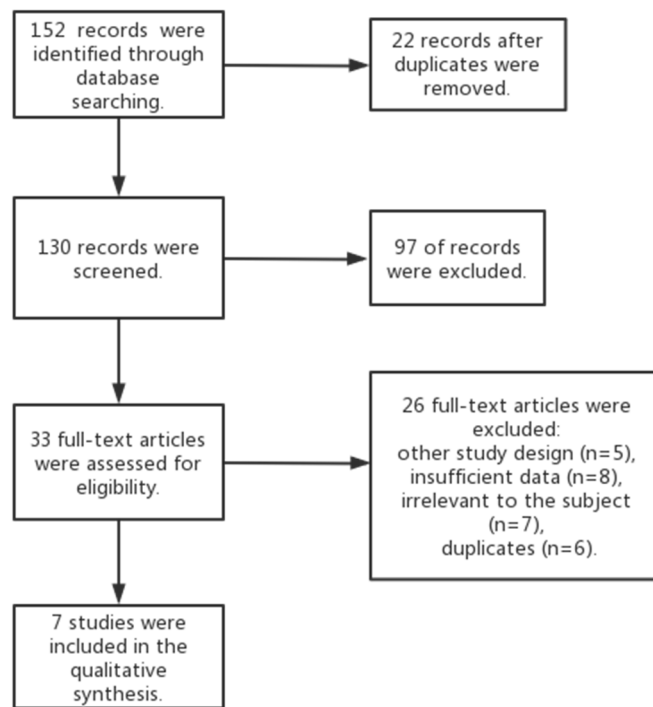

**Figure S1.** Flow chart of article screening.

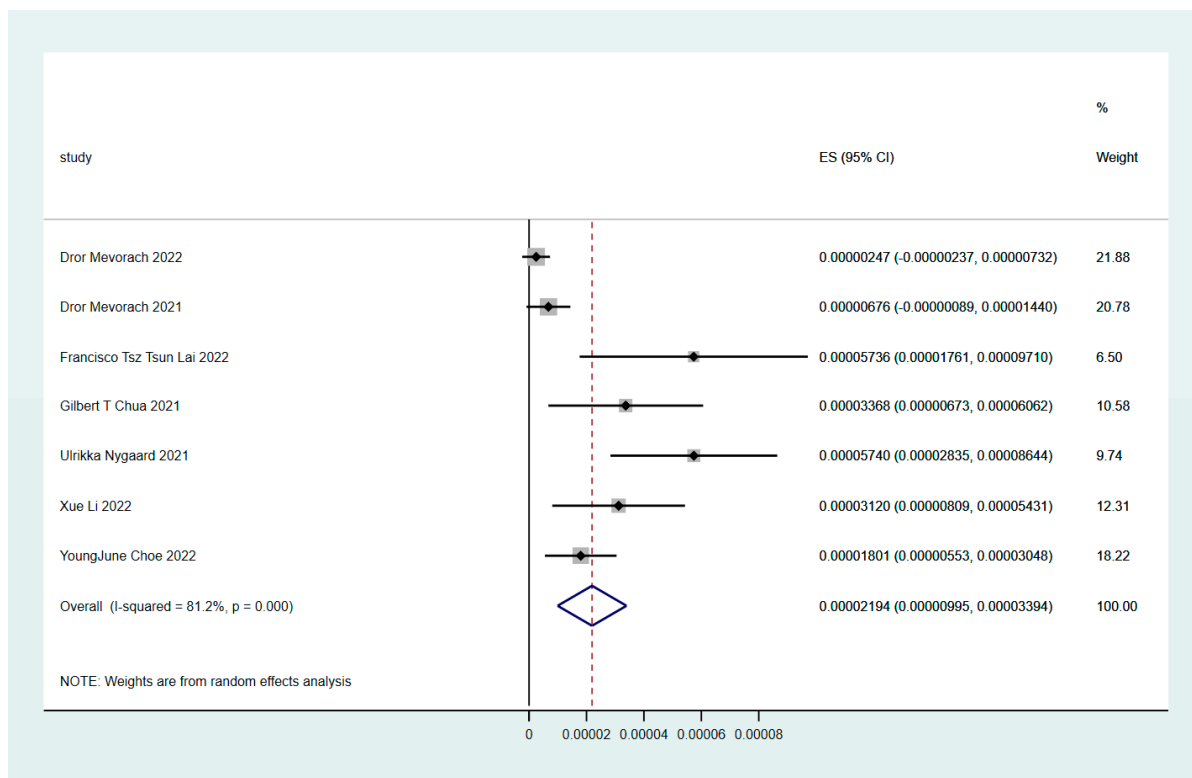

**Figure S2.** Incidence of myocarditis or pericarditis after the first dose of vaccine.

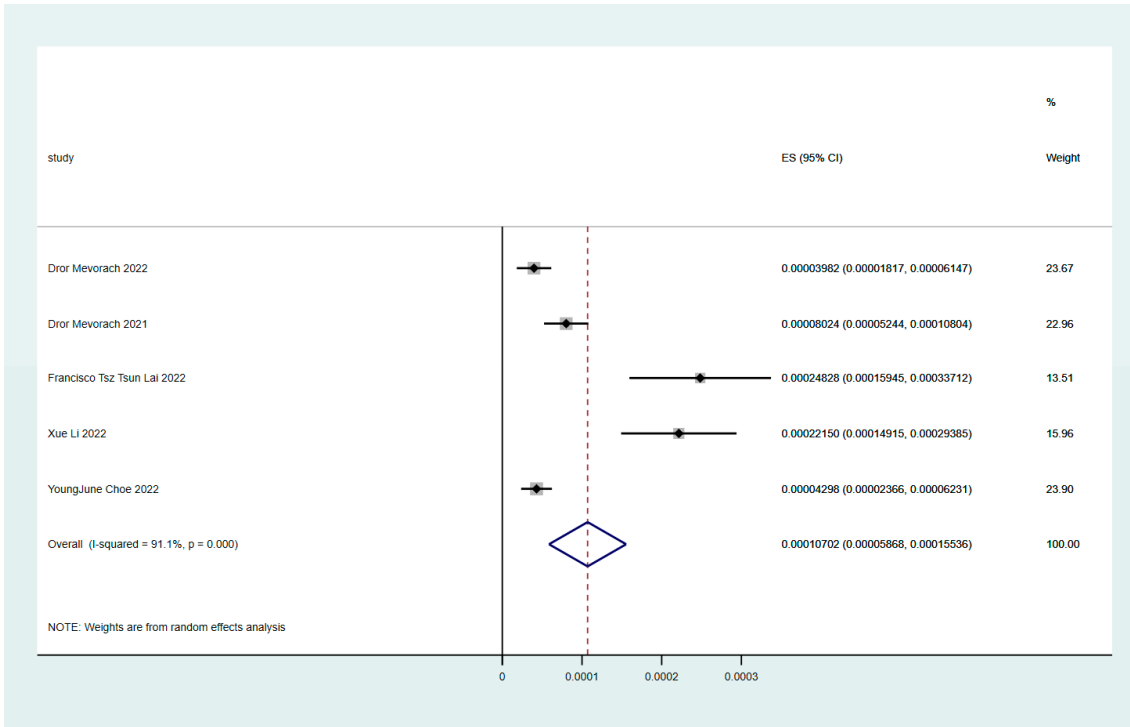

**Figure S3.** Incidence of myocarditis or pericarditis after the second dose of vaccine.

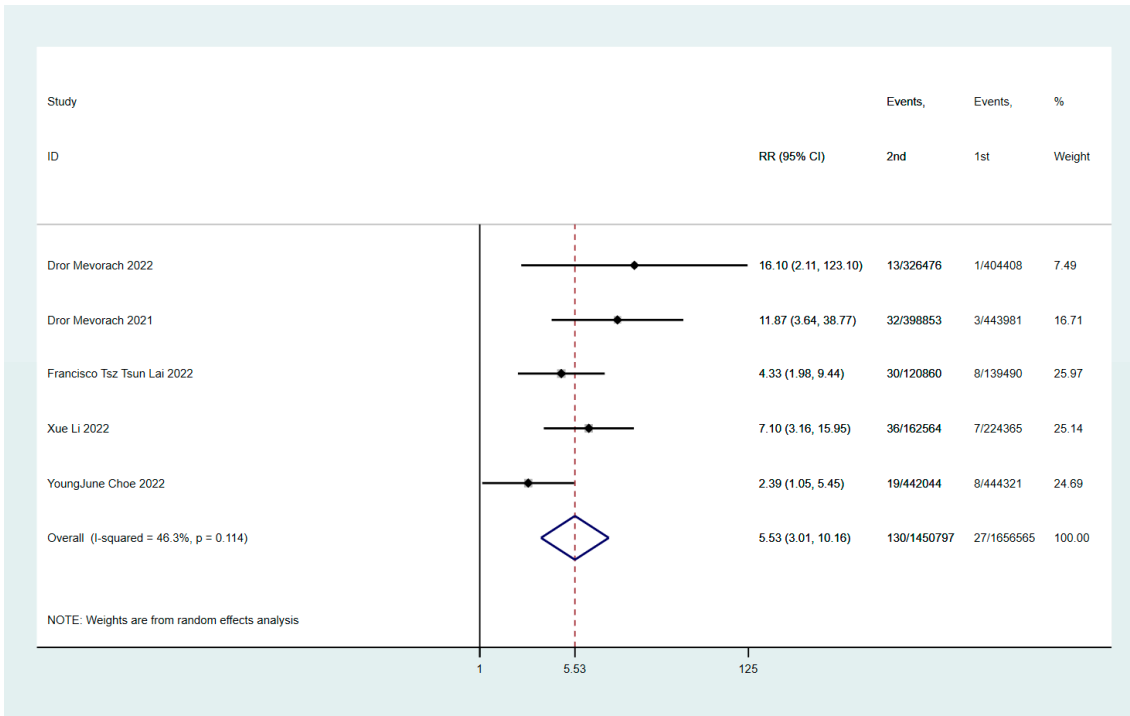

**Figure S4.** Incidence risk relative to the second and first doses.

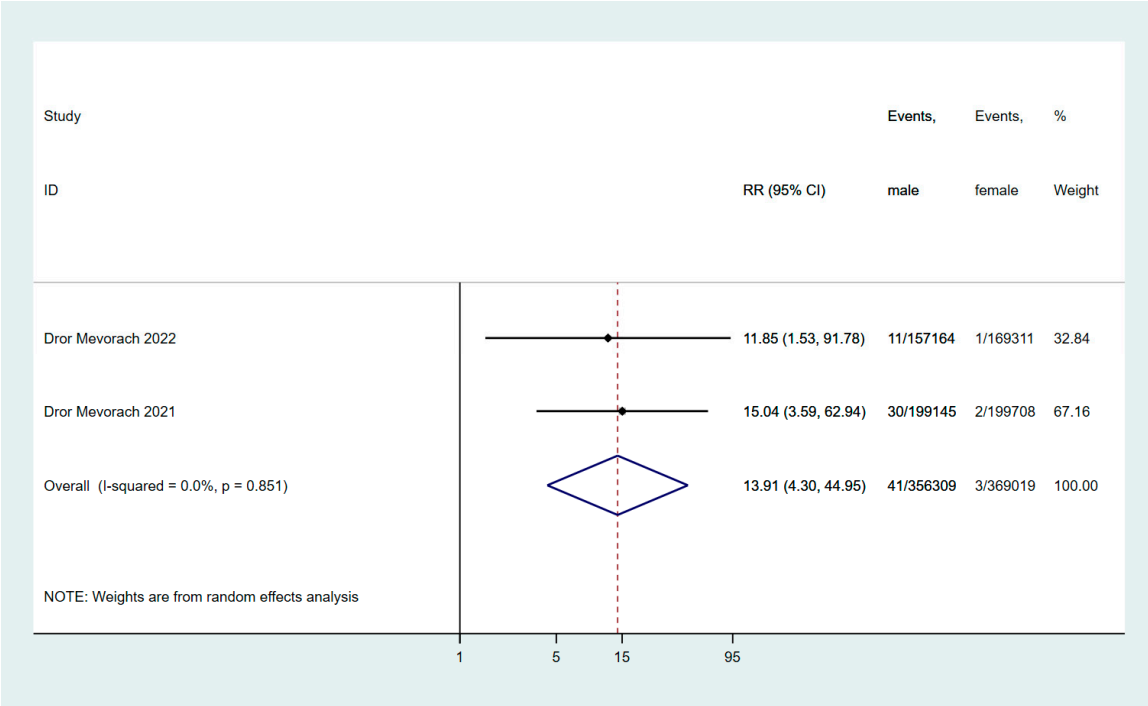

**Figure S5.** Male and female relative risk incidence of myocarditis or pericarditis.
